# Supplementary material for: Actinobacteria Isolated From Laminaria ochroleuca: A Source of New Bioactive Compounds
Source: PubMed Central journal article supplement (PMC6465344; doi:10.3389/fmicb.2019.00683), 2019-04-09
Supplement: Data_Sheet_1.pdf [file Data_Sheet_1.pdf]

## Supplementary Material

### **Actinobacteria isolated from *Laminaria ochroleuca*: a source of new bioactive compounds**

Mariana Girão<sup>1,2</sup>, Inês Ribeiro<sup>1</sup>, Tiago Ribeiro<sup>1</sup>, Isabel C. Azevedo<sup>1</sup>, Filipe Pereira<sup>1</sup>,  
Ralph Urbatzka<sup>1</sup>, Pedro N. Leão<sup>1</sup>, Maria F. Carvalho<sup>1\*</sup>

<sup>1</sup> Interdisciplinary Centre for Marine and Environmental Research, University of Porto, Porto, Portugal

<sup>2</sup> Department of Biology, Faculty of Sciences, University of Porto, Porto, Portugal

Corresponding author\*

M.F. Carvalho

CIIMAR – Interdisciplinary Centre of Marine and Environmental Research, University of Porto

Terminal de Cruzeiros do Porto de Leixões, Avenida General Norton de Matos s/n, 4450-208  
Matosinhos, Portugal

e-mail: mcarvalho@ciimar.up.pt

Tel.: +351 223401804

**Table S1.** Taxonomic identification of the actinobacterial isolates recovered from *Laminaria ochroleuca* and corresponding GenBank accession number.

| Isolate | Part of <i>L. ochroleuca</i> from which it was isolated | Taxonomic Identification              |                             |                          |
|---------|---------------------------------------------------------|---------------------------------------|-----------------------------|--------------------------|
|         |                                                         | Closest Relative                      | Similarity (%) <sup>*</sup> | GenBank Accession Number |
| KENR1   | Holdfast                                                | <i>Streptomyces aureus</i>            | 99                          | MK254613                 |
| KENR3   | Holdfast                                                | <i>Streptomyces olivochromogenes</i>  | 99                          | MK254601                 |
| KENR4   | Holdfast                                                | <i>Streptomyces olivochromogenes</i>  | 99                          | MK254600                 |
| KENR5   | Holdfast                                                | <i>Streptomyces flavofuscus</i>       | 99                          | MK254572                 |
| KENR6   | Holdfast                                                | <i>Streptomyces sampsonii</i>         | 99                          | MK254568                 |
| KENR7   | Holdfast                                                | <i>Streptomyces gougerotii</i>        | 100                         | MK254563                 |
| KENR8   | Holdfast                                                | <i>Streptomyces atratus</i>           | 99                          | MK254615                 |
| KENR10  | Holdfast                                                | <i>Streptomyces diastaticus</i>       | 99                          | MK254610                 |
| KENR11  | Holdfast                                                | <i>Streptomyces diastaticus</i>       | 100                         | MK254609                 |
| KENR11A | Holdfast                                                | <i>Streptomyces champavatii</i>       | 99                          | MK254597                 |
| KENR13  | Holdfast                                                | <i>Streptomyces coelicolor</i>        | 100                         | MK254596                 |
| KENR13A | Holdfast                                                | <i>Streptomyces champavatii</i>       | 99                          | MK254595                 |
| KENR13B | Holdfast                                                | <i>Streptomyces exfoliates</i>        | 99                          | MK254594                 |
| KENR13C | Holdfast                                                | <i>Streptomyces diastaticus</i>       | 99                          | MK254605                 |
| KENR14  | Holdfast                                                | <i>Streptomyces xiamenensis</i>       | 98                          | MK254606                 |
| KENR16A | Holdfast                                                | <i>Streptomyces thermodiastaticus</i> | 99                          | MK254552                 |
| KENR16B | Holdfast                                                | <i>Streptomyces champavatii</i>       | 99                          | MK254593                 |
| KENR17A | Holdfast                                                | <i>Streptomyces sampsonii</i>         | 99                          | MK254592                 |
| KENR17B | Holdfast                                                | <i>Streptomyces champavatii</i>       | 99                          | MK254591                 |
| KENR18  | Holdfast                                                | <i>Streptomyces globisporus</i>       | 98                          | MK254590                 |
| KENR19  | Holdfast                                                | <i>Streptomyces champavatii</i>       | 99                          | MK254589                 |
| KENR21  | Holdfast                                                | <i>Streptomyces sampsonii</i>         | 99                          | MK254588                 |
| KENR21A | Holdfast                                                | <i>Streptomyces exfoliatus</i>        | 100                         | MK254587                 |
| KENR23A | Holdfast                                                | <i>Streptomyces exfoliatus</i>        | 100                         | MK254586                 |
| KENR23B | Holdfast                                                | <i>Streptomyces achromogenes</i>      | 99                          | MK254620                 |
| KENR23C | Holdfast                                                | <i>Streptomyces champavatii</i>       | 100                         | MK254585                 |
| KENR23D | Holdfast                                                | <i>Streptomyces coelicolor</i>        | 99                          | MK254584                 |
| KENR24  | Holdfast                                                | <i>Streptomyces champavatii</i>       | 99                          | MK254583                 |
| KENR25  | Holdfast                                                | <i>Streptomyces sampsonii</i>         | 99                          | MK254582                 |
| KENR26  | Holdfast                                                | <i>Streptomyces cyaneofuscatus</i>    | 99                          | MK254581                 |
| KENR27  | Holdfast                                                | <i>Streptomyces gougerotii</i>        | 100                         | MK254580                 |
| KENR28  | Holdfast                                                | <i>Streptomyces atratus</i>           | 99                          | MK254617                 |
| KENR29  | Holdfast                                                | <i>Nonomuraea coxensis</i>            | 99                          | MK254624                 |
| KENR30  | Holdfast                                                | <i>Nocardiosis prasina</i>            | 99                          | MK254627                 |
| KENR31  | Holdfast                                                | <i>Streptomyces camponoticapitis</i>  | 99                          | MK254579                 |
| KENR32  | Holdfast                                                | <i>Streptomyces achromogenes</i>      | 99                          | MK254619                 |
| KENR33  | Holdfast                                                | <i>Streptomyces lannensis</i>         | 99                          | MK254604                 |
| KENR34  | Holdfast                                                | <i>Streptomyces champavatii</i>       | 99                          | MK254578                 |
| KENR35  | Holdfast                                                | <i>Streptomyces sampsonii</i>         | 99                          | MK254577                 |
| KENR36  | Holdfast                                                | <i>Streptomyces champavatii</i>       | 99                          | MK254576                 |
| KENR38  | Holdfast                                                | <i>Streptomyces flaveolus</i>         | 99                          | MK254607                 |
| KENR39  | Holdfast                                                | <i>Rhodococcus erythropolis</i>       | 99                          | MK254623                 |
| KENR40  | Holdfast                                                | <i>Streptomyces champavatii</i>       | 99                          | MK254575                 |
| KENR41  | Holdfast                                                | <i>Streptomyces tendae</i>            | 99                          | MK254553                 |
| KENR42  | Holdfast                                                | <i>Streptomyces mirabilis</i>         | 99                          | MK254603                 |
| KENR45A | Holdfast                                                | <i>Streptomyces hebeiensis</i>        | 98                          | MK254574                 |
| KENR47  | Holdfast                                                | <i>Streptomyces coelicolor</i>        | 100                         | MK254573                 |
| KENR49  | Holdfast                                                | <i>Streptomyces atratus</i>           | 99                          | MK254616                 |
| KENR50  | Holdfast                                                | <i>Streptomyces sanglieri</i>         | 99                          | MK254599                 |
| KENR51  | Holdfast                                                | <i>Streptomyces sanglieri</i>         | 99                          | MK254598                 |
| KENR52  | Holdfast                                                | <i>Streptomyces mirabilis</i>         | 99                          | MK254602                 |
| KENR55  | Holdfast                                                | <i>Streptomyces albospinus</i>        | 99                          | MK254571                 |
| KENR57  | Holdfast                                                | <i>Streptomyces sampsonii</i>         | 99                          | MK254570                 |
| KENR59  | Holdfast                                                | <i>Streptomyces olivaceus</i>         | 99                          | MK254569                 |
| KENR60  | Holdfast                                                | <i>Streptomyces coelicolor</i>        | 100                         | MK254567                 |

|        |          |                                   |     |          |
|--------|----------|-----------------------------------|-----|----------|
| KENR64 | Holdfast | <i>Streptomyces olivaceus</i>     | 99  | MK254566 |
| KENR65 | Holdfast | <i>Streptomyces pratensis</i>     | 99  | MK254565 |
| KENR69 | Holdfast | <i>Streptomyces sampsonii</i>     | 99  | MK254564 |
| KENR70 | Holdfast | <i>Nocardiopsis prasina</i>       | 99  | MK254626 |
| KENR71 | Holdfast | <i>Streptomyces brevispora</i>    | 99  | MK254611 |
| KENR72 | Holdfast | <i>Streptomyces aureus</i>        | 99  | MK254612 |
| KENR74 | Holdfast | <i>Streptomyces coelicolor</i>    | 99  | MK254562 |
| KENR75 | Holdfast | <i>Streptomyces tendae</i>        | 99  | MK254561 |
| KENR76 | Holdfast | <i>Rhodococcus erythropolis</i>   | 99  | MK254622 |
| KENR77 | Holdfast | <i>Streptomyces champavatii</i>   | 99  | MK254560 |
| KENR78 | Holdfast | <i>Rhodococcus erythropolis</i>   | 99  | MK254621 |
| KENR79 | Holdfast | <i>Streptomyces coelicolor</i>    | 99  | MK254559 |
| KENR80 | Holdfast | <i>Streptomyces coelicolor</i>    | 99  | MK254558 |
| KENR81 | Holdfast | <i>Streptomyces champavatii</i>   | 99  | MK254557 |
| KENR82 | Holdfast | <i>Isoptericola chiayiensis</i>   | 98  | MK254634 |
| KENR84 | Holdfast | <i>Isoptericola chiayiensis</i>   | 99  | MK254633 |
| KENR85 | Holdfast | <i>Streptomyces diastaticus</i>   | 100 | MK254608 |
| KENR86 | Holdfast | <i>Streptomyces coelicolor</i>    | 99  | MK254556 |
| KENR87 | Holdfast | <i>Streptomyces xiamenensis</i>   | 99  | MK254551 |
| KENR89 | Holdfast | <i>Streptomyces atratus</i>       | 99  | MK254614 |
| KENR90 | Holdfast | <i>Nocardiopsis prasina</i>       | 98  | MK254625 |
| KENR91 | Holdfast | <i>Streptomyces sampsonii</i>     | 100 | MK254555 |
| KENR92 | Holdfast | <i>Streptomyces fulissimus</i>    | 99  | MK254554 |
| KENR93 | Holdfast | <i>Microbacterium testaceum</i>   | 99  | MK254630 |
| KENR94 | Holdfast | <i>Streptomyces champavatii</i>   | 99  | MK254547 |
| KENS1  | Stipe    | <i>Microbacterium testaceum</i>   | 98  | MK254629 |
| KENS2  | Stipe    | <i>Microbispora bryophytorum</i>  | 100 | MK254628 |
| KENB1  | Blade    | <i>Streptomyces atratus</i>       | 99  | MK254618 |
| KENB3  | Blade    | <i>Streptomyces shenzhenensis</i> | 100 | MK254550 |
| KENB5  | Blade    | <i>Streptomyces atratus</i>       | 99  | MK254549 |
| KENB6  | Blade    | <i>Streptomyces sampsonii</i>     | 99  | MK254548 |
| KENB7  | Blade    | <i>Microbacterium testaceum</i>   | 98  | MK254631 |
| KENB8  | Blade    | <i>Streptomyces champavatii</i>   | 99  | MK254546 |
| KENB9  | Blade    | <i>Streptomyces coelicolor</i>    | 99  | MK254545 |
| KENB10 | Blade    | <i>Streptomyces sampsonii</i>     | 99  | MK254632 |

\*According to 16S ribosomal RNA (Bacteria and Archaea) database from NCBI BLAST.

**Table S2.** GNPS dereplication results for the 35 actinobacterial crude extracts selected, indicating the compounds recorded for each one and the correspondent cosine score, which indicates the similarity of two MS/MS spectra from 0 (totally dissimilar) to 1 (completely identical).

| Strain  | Taxonomic Identification         | Compound                 | Cosine | <i>m/z</i> error ppm | Lib <i>m/z</i> |
|---------|----------------------------------|--------------------------|--------|----------------------|----------------|
| KENR6   | <i>Streptomyces</i> sp.          | Antimycin A <sub>2</sub> | 0.92   | 12                   | 535.27         |
|         |                                  | Antimycin A <sub>3</sub> | 0.92   | 17                   | 521.26         |
| KENR8   | <i>Streptomyces atratus</i>      | Antimycin A <sub>2</sub> | 0.91   | 12                   | 535.27         |
| KENR11A | <i>Streptomyces</i> sp.          | Antimycin A <sub>2</sub> | 0.93   | 12                   | 535.27         |
|         |                                  | Antimycin A <sub>3</sub> | 0.91   | 17                   | 521.26         |
| KENR13  | <i>Streptomyces</i> sp.          | Antimycin A <sub>2</sub> | 0.92   | 12                   | 535.27         |
|         |                                  | Antimycin A <sub>3</sub> | 0.92   | 18                   | 521.26         |
| KENR13A | <i>Streptomyces</i> sp.          | Antimycin A <sub>2</sub> | 0.92   | 11                   | 535.27         |
|         |                                  | Antimycin A <sub>3</sub> | 0.92   | 18                   | 521.26         |
| KENR13B | <i>Streptomyces</i> sp.          | Antimycin A <sub>2</sub> | 0.91   | 13                   | 535.27         |
|         |                                  | Antimycin A <sub>3</sub> | 0.91   | 18                   | 521.26         |
|         |                                  | Antimycin A <sub>1</sub> | 0.85   | 2                    | 549.28         |
|         |                                  | Antimycin A <sub>4</sub> | 0.85   | 2                    | 507.23         |
| KENR14  | <i>Streptomyces iamenensis</i>   | Antimycin A <sub>2</sub> | 0.91   | 12                   | 535.27         |
| KENR17A | <i>Streptomyces</i> sp.          | Antimycin A <sub>2</sub> | 0.92   | 13                   | 535.27         |
|         |                                  | Antimycin A <sub>3</sub> | 0.91   | 17                   | 521.26         |
| KENR18  | <i>Streptomyces</i> sp.          | Antimycin A <sub>2</sub> | 0.92   | 12                   | 535.27         |
|         |                                  | Antimycin A <sub>3</sub> | 0.92   | 18                   | 521.26         |
| KENR21A | <i>Streptomyces</i> sp.          | Antimycin A <sub>2</sub> | 0.92   | 12                   | 535.27         |
|         |                                  | Antimycin A <sub>3</sub> | 0.92   | 18                   | 521.26         |
| KENR25  | <i>Streptomyces</i> sp.          | Antimycin A <sub>2</sub> | 0.92   | 13                   | 535.27         |
|         |                                  | Antimycin A <sub>3</sub> | 0.91   | 18                   | 521.26         |
| KENR29  | <i>Streptomyces</i> sp.          | Antimycin A <sub>2</sub> | 0.91   | 12                   | 535.27         |
|         |                                  | Antimycin A <sub>3</sub> | 0.90   | 18                   | 521.26         |
| KENR31  | <i>Streptomyces</i> sp.          | No match                 | -      | -                    | -              |
| KENR33  | <i>Streptomyces lannensis</i>    | Antimycin A <sub>2</sub> | 0.92   | 12                   | 535.27         |
|         |                                  | Antimycin A <sub>3</sub> | 0.92   | 18                   | 521.26         |
| KENR35  | <i>Streptomyces</i> sp.          | Antimycin A <sub>3</sub> | 0.93   | 17                   | 521.26         |
|         |                                  | Antimycin A <sub>2</sub> | 0.92   | 11                   | 535.27         |
| KENR49  | <i>Streptomyces atratus</i>      | Antimycin A <sub>2</sub> | 0.91   | 13                   | 535.27         |
| KENR59  | <i>Streptomyces</i> sp.          | No match                 | -      | -                    | -              |
| KENR60  | <i>Streptomyces</i> sp.          | No match                 | -      | -                    | -              |
| KENR64  | <i>Streptomyces</i> sp.          | No match                 | -      | -                    | -              |
| KENR65  | <i>Streptomyces</i> sp.          | No match                 | -      | -                    | -              |
| KENR72  | <i>Streptomyces aureus</i>       | Antimycin A <sub>2</sub> | 0.92   | 12                   | 535.27         |
|         |                                  | Antimycin A <sub>3</sub> | 0.90   | 18                   | 521.26         |
| KENR74  | <i>Streptomyces</i> sp.          | Antimycin A <sub>2</sub> | 0.92   | 11                   | 535.27         |
|         |                                  | Antimycin A <sub>3</sub> | 0.92   | 17                   | 521.26         |
| KENR77  | <i>Streptomyces</i> sp.          | Antimycin A <sub>3</sub> | 0.92   | 11                   | 521.26         |
|         |                                  | Antimycin A <sub>2</sub> | 0.90   | 17                   | 535.27         |
| KENR80  | <i>Streptomyces</i> sp.          | Antimycin A <sub>2</sub> | 0.92   | 12                   | 535.27         |
|         |                                  | Antimycin A <sub>3</sub> | 0.91   | 17                   | 521.26         |
| KENR81  | <i>Streptomyces</i> sp.          | Antimycin A <sub>2</sub> | 0.92   | 13                   | 535.27         |
|         |                                  | Antimycin A <sub>3</sub> | 0.91   | 17                   | 521.26         |
| KENR84  | <i>Isoptericola</i> sp.          | Antimycin A <sub>2</sub> | 0.92   | 13                   | 535.27         |
|         |                                  | Antimycin A <sub>3</sub> | 0.91   | 17                   | 521.26         |
| KENR85  | <i>Streptomyces</i> sp.          | No match                 | -      | -                    | -              |
| KENR86  | <i>Streptomyces</i> sp.          | No match                 | -      | -                    | -              |
| KENR91  | <i>Streptomyces</i> sp.          | No match                 | -      | -                    | -              |
| KENR94  | <i>Streptomyces</i> sp.          | Antimycin A <sub>3</sub> | 0.88   | 18                   | 521.26         |
| KENS2   | <i>Microbispora bryophytorum</i> | Antimycin A <sub>2</sub> | 0.90   | 12                   | 535.27         |
| KENB1   | <i>Streptomyces atratus</i>      | No match                 | -      | -                    | -              |
| KENB3   | <i>Streptomyces</i> sp.          | Antimycin A <sub>2</sub> | 0.92   | 12                   | 535.27         |
|         |                                  | Antimycin A <sub>3</sub> | 0.92   | 18                   | 521.26         |
| KENB9   | <i>Streptomyces</i> sp.          | Antimycin A <sub>2</sub> | 0.91   | 12                   | 535.27         |
| KENB10  | <i>Streptomyces</i> sp.          | Antimycin A <sub>2</sub> | 0.88   | 17                   | 535.27         |

**Table S3.** Dictionary of Natural Products dereplication results for the clusters selected for strains KENR85 and KENR91.

| Strain        | Compound           | Molecular Formula                                                            | m/z Error ppm | Biological Activity | Biological Source                                                 |
|---------------|--------------------|------------------------------------------------------------------------------|---------------|---------------------|-------------------------------------------------------------------|
| <b>KENR85</b> | WS 5995B           | C <sub>19</sub> H <sub>14</sub> O <sub>6</sub>                               | 0.9           | Antifungal          | <i>Streptomyces auranticolor</i> P5365                            |
|               | Fluostatin A       | C <sub>19</sub> H <sub>14</sub> O <sub>6</sub>                               | 0.9           | Antimicrobial       | <i>Micromonospora rosaria</i> N160                                |
|               | Landomycin A       | C <sub>19</sub> H <sub>14</sub> O <sub>6</sub>                               | 0.9           | Antibiotic          | <i>Streptomyces cyanogenus</i> S-136                              |
|               | Tetrangomycin      | C <sub>19</sub> H <sub>14</sub> O <sub>6</sub>                               | 0.9           | Antimicrobial       | <i>Streptomyces olivaceus</i><br><i>Streptomyces matensis</i>     |
|               | Thiazostatin A     | C <sub>15</sub> H <sub>18</sub> N <sub>2</sub> O <sub>3</sub> S <sub>2</sub> | 8.3           | Antioxidant         | <i>Streptomyces toluosus</i>                                      |
| <b>KENR86</b> | JBIR 107           | C <sub>24</sub> H <sub>28</sub> N <sub>2</sub> O <sub>5</sub>                | 9.6           | Antibiotic          | <i>Streptomyces tateyamensis</i> NBRC 105047                      |
|               | Streptophenazine A | C <sub>24</sub> H <sub>28</sub> N <sub>2</sub> O <sub>5</sub>                | 9.6           | Antibacterial       | <i>Streptomyces</i> sp. HB202<br><i>Streptomyces</i> sp. BCC21835 |
|               | Streptophenazine B | C <sub>24</sub> H <sub>28</sub> N <sub>2</sub> O <sub>5</sub>                | 9.6           | Antibacterial       | <i>Streptomyces</i> sp. HB202<br><i>Streptomyces</i> sp. BCC21835 |
|               | Streptophenazine G | C <sub>24</sub> H <sub>28</sub> N <sub>2</sub> O <sub>5</sub>                | 9.6           | Antibacterial       | <i>Streptomyces</i> sp. HB202                                     |

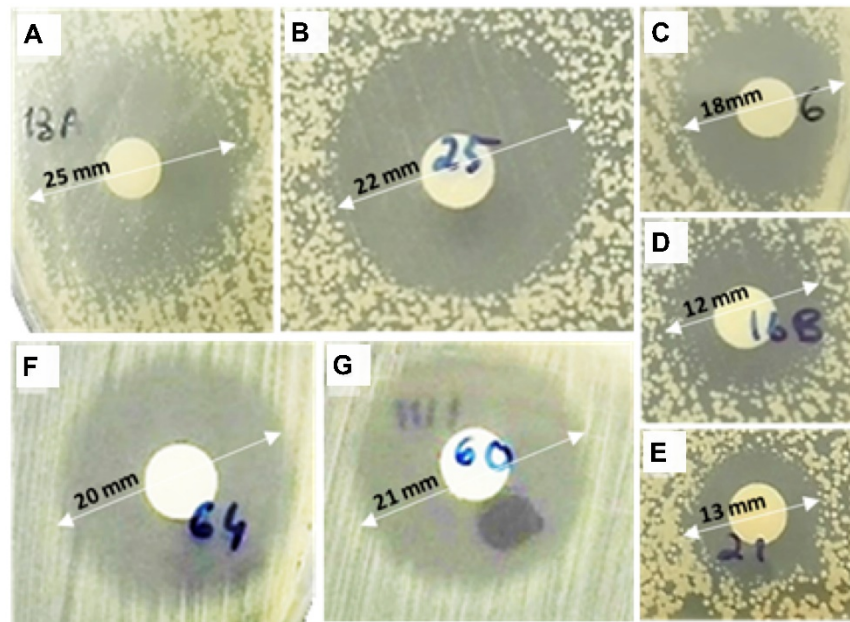

**Figure S1.** Antimicrobial activity of actinobacterial strains isolated from *L. ochroleuca*. (A-E) Examples of inhibition halos against *C. albicans* and (F-G) against *S. aureus*. (A) Strain KENR13A, (B) strain KENR25, (C) strain KENR6, (D) strain KENR16B, (E) strain KENR21, (F) strain KENR64 and (G) strain KENR60.

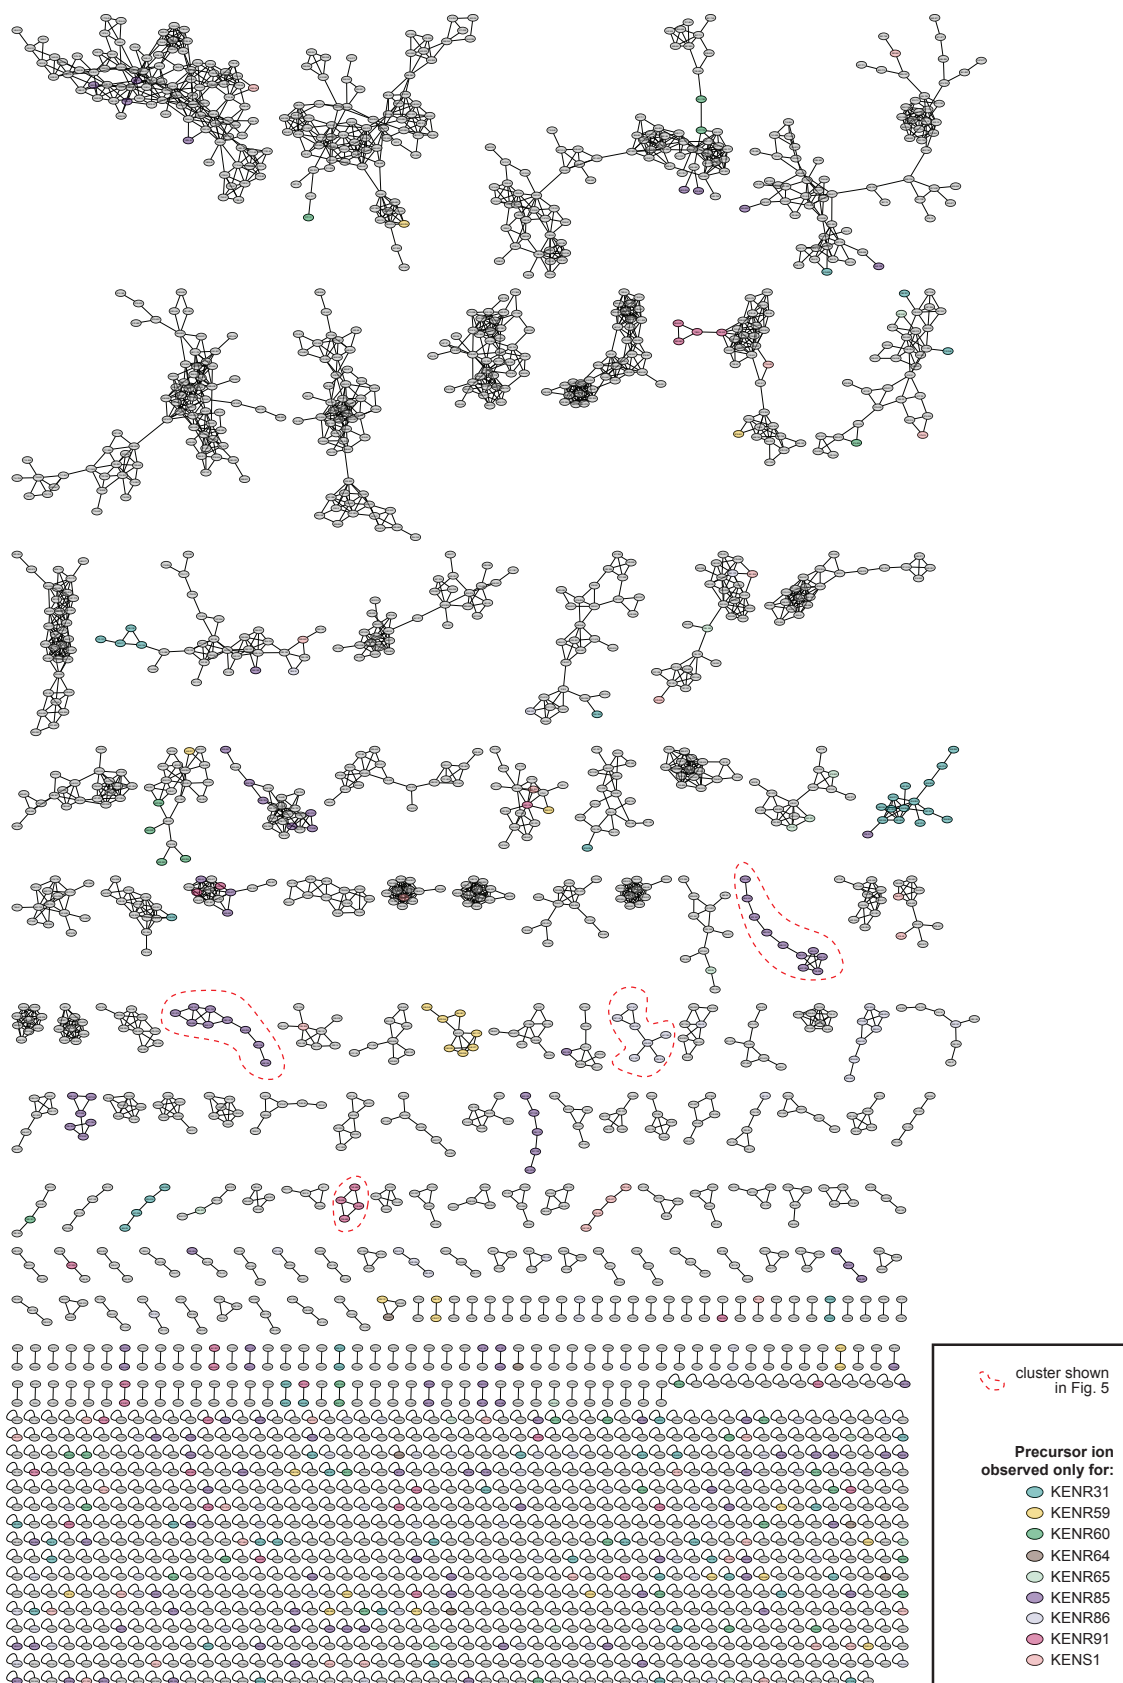

**Figure S2.** GNPS molecular networking using MS/MS data from extracts KENR31, KENR59, KENR60, KENR64, KENR65, KENR85, KENR86, KENR91 and KENB1. The value indicated in each node corresponds to the precursor ion.
